1 **Title:** Chronic optogenetic stimulation of hippocampal engrams variably modulates social  
2 behaviors in mice

3 **Authors:** Emily Doucette<sup>1</sup>, Heloise Leblanc<sup>1</sup>, Amy Monasterio<sup>1</sup>, Christine Cincotta<sup>1</sup>, Stephanie  
4 L. Grella<sup>1</sup>, Jesse Logan<sup>1</sup>, Steve Ramirez<sup>1</sup>

5  
6 1. Department of Psychological and Brain Sciences, Boston University, Boston, MA, USA.

7  
8 **Correspondence:** dvsteve@bu.edu

## 9 10 **Abstract**

11 The hippocampus processes both spatial-temporal information and emotionally salient  
12 experiences. To test the functional properties of discrete sets of cells in the dorsal dentate gyrus  
13 (dDG), we examined whether chronic optogenetic reactivation of these ensembles was  
14 sufficient to modulate social behaviors in mice. We found that chronic reactivation of dDG cells  
15 in male mice was sufficient to enhance social behaviors in a female exposure task when  
16 compared to pre-stimulation levels. However, chronic reactivation of these cells was not  
17 sufficient to modulate group differences in a separate subset of social behaviors, and multi-  
18 region analysis of neural activity did not yield detectable differences in immediate-early gene  
19 expression or neurogenesis, suggesting a dissociation between our chronic stimulation-induced  
20 behavioral effects and underlying neural responses. Together, our results demonstrate that  
21 chronic optogenetic stimulation of cells processing valent experiences enduringly and  
22 unidirectionally modulates social interactions between male and female mice.

## 23 24 **1. Introduction**

25 Social behaviors are dramatically impaired across many psychiatric disorders, though  
26 the underlying mechanisms sufficient to precipitate or alleviate such impairments remain largely  
27 unknown. Promisingly, previous studies have demonstrated that chronic optogenetic  
28 reactivation of both cell bodies and projection-specific elements can “reprogram” circuit-level  
29 and behavioral outputs in healthy and maladaptive states (Creed, Pascoli, & Lüscher, 2019;  
30 Tye, 2014). However, the behavioral effects of chronic optogenetic stimulation of memory  
31 ensembles are region-specific and experience dependent. Specifically, reactivating dDG cells  
32 that were active during a positive experience was sufficient to rescue depressive-like behavior in  
33 mice, while chronically reactivating dDG cells previously active during fear conditioning was  
34 sufficient to lastingly suppress or enhance a context-specific memory (Ramirez et al., 2015;

35 Chen et al., 2019). To test whether or not our chronic stimulation strategy generalizes to other  
36 behaviors, here we examined whether chronic optogenetic reactivation of ensembles in the dDG  
37 which are active during putative positive or negative experiences is sufficient to alter social  
38 behaviors as well as the activity of multiple brain regions.

39

## 40 **2. Methods**

### 41 *2.1 Subjects*

42 Wild-type C57BL/6N male mice (40-41 days; Charles River Laboratories) were housed with  
43 littermates in groups of 2-5 mice per cage. Mice were acclimated to the animal facility for 72  
44 hours upon delivery before experimental procedures began and kept on a 12:12-hour light cycle  
45 (lights on at 7:00). Food and water were available *ad libitum*. Animals were put on a diet  
46 containing 40 mg/kg doxycycline (dox) after the acclimation period and 24-48 hours before  
47 receiving surgery between 6-7 weeks of age. Following surgery, mice were group-housed with  
48 littermates and were left for 10 days to recover with food and water *ad libitum* prior to  
49 experimentation. Animals were handled for 2-4 days (2 minutes per animal) at the end of the  
50 recovery period. They were also habituated to optogenetic stimulation conditions by plugging  
51 the patch cord into their headcaps and allowing them to walk around freely for 2 minutes per  
52 day for 2 days, prior to the start of the experimental period. All procedures related to mouse  
53 care and treatment were in accordance with Boston University and National Institutes of Health  
54 guidelines for the Care and Use of Laboratory animals.

55

### 56 *2.2 Virus constructs and packaging; stereotaxic surgery*

57 The pAAV<sub>9</sub>-c-Fos-tTA and pAAV<sub>9</sub>-TRE-ChR2-eYFP plasmids were constructed as described  
58 previously (Ramirez et al., 2013). Using these plasmids, AAV<sub>9</sub> viruses were generated at the  
59 Gene Therapy Center and Vector Core at the University of Massachusetts Medical School. Viral  
60 titres were  $1 \times 10^{13}$  genome copy per milliliter for AAV<sub>9</sub>-TRE-ChR2-eYFP and  $1.5 \times 10^{13}$  genome  
61 copy per milliliter for AAV<sub>9</sub>-c-Fos-tTA.

62 All surgeries were performed under stereotaxic guidance and the following coordinates are  
63 given relative to bregma. Anesthesia was induced using 3.5% isoflurane inhalation and  
64 maintained throughout surgery at 1.5 - 2.0%. Animals received bilateral craniotomies using a  
65 0.6 mm diameter drill bit for dDG injections. The needle was slowly lowered to the target site of -  
66 2.2 mm AP,  $\pm 1.3$  mm ML, -2.0 mm DV (relative to Bregma). A cocktail consisting of 300 nL of  
67 AAV<sub>9</sub>-c-Fos-tTa (300nL) + AAV<sub>9</sub>-TRE-ChR2-eYFP (300nL) was infused into the dDG (100nL  
68  $\text{min}^{-1}$ ) using a 33-gauge needle attached to a mineral-oil filled 10  $\mu\text{L}$  gastight syringe (Hamilton,

69 #7653-01) (Figure 1A). The needle remained at the target site for 2 minutes post-injection  
70 before being slowly withdrawn. A bilateral optical fiber implant (200  $\mu$ m core diameter; Doric  
71 Lenses) was lowered above the dDG injection site at -1.6 mm DV. Two bone anchor screws  
72 were secured into the skull at the anterior edges of the surgical site to anchor the implant.  
73 Layers of adhesive cement (C&B Metabond) followed by dental cement (Stoelting) were spread  
74 over the surgical site to secure the optical fiber implant to the skull. Mice received 0.1 mL  
75 buprenorphine (0.03 mg/mL i.p) and were transferred to recovery cages atop heating pads until  
76 recovery from anaesthesia. Mice were given 10 days to recover before start of experiment.  
77 Injections were verified histologically. Only data from mice with bilateral opsin expression  
78 present in the dDG were used for analyses.

79

### 80 *2.3 Neuronal tagging of behavioral epochs and counterbalanced behavior*

81 In order to label the dDG cells active during a behavioral epoch, the dox diet is substituted with  
82 normal mouse chow; this occurs 48 hours prior to the epoch to allow for complete clearance of  
83 dox and to open the window for activity-dependent neuronal tagging (Garner et al., 2012; Liu et  
84 al., 2012) (Figure 1B-C). The mice were divided into 3 groups, and each group received a  
85 different “tagged” behavioral epoch to start, however, all mice received all behavioral epochs  
86 counterbalanced using a balanced Latin square design over a period of 3 days (negative-  
87 neutral-positive; positive-negative-neutral; neutral-negative-positive). 1) *Footshock (negative)*:  
88 animals were placed in a fear conditioning chamber and given a 4-shock protocol over a period  
89 of 500s (1.5 mA, 2s duration, 198s, 278s, 358s, 438s). 2) *Female exposure (positive)*: one  
90 female mouse (PD 30-40) was placed in a clean homecage with a clear, ventilated acrylic top.  
91 The experimental animal was then placed into the cage and allowed to freely interact with the  
92 female for 1 hour. 3) *Clean homecage (neutral)*: mice were individually placed in a clean  
93 homecage with a clear, ventilated acrylic cage top for 500s. Immediately following the tagged  
94 behavioral epoch, mice were placed back into their homecage and again given access to dox to  
95 close the neuronal tagging window. Mice were weighed daily and monitored for health.

96

### 97 *2.4 Pre-stimulation female exposure*

98 The total amount of time that male mice interacted with a female mouse - defined as sniffing,  
99 chasing, mounting, or other contact initiated by the male - within the first 5 minutes of the 1  
100 hour, pre-optogenetic stimulation exposure was manually scored (termed “baseline” time point).

101

### 102 *2.5 Chronic optogenetic stimulation protocol*

103 Optical stimulation was administered twice daily during the light cycle at approximately 10:00  
104 and again at 15:00 daily for 5 days, to animals at 8-9 weeks of age. Prior to the start of the  
105 session, laser output was tested to ensure that at least 10 mW of power was delivered at the  
106 end of the patch cord (Doric Lenses). Each stimulation session lasted for 10 minutes (450 nm,  
107 20 Hz, 15 ms pulse width) and was conducted in an almond-scented custom-built acrylic  
108 rectangular chamber with striped walls under dim lighting. The first round of behavioral tests  
109 began one day after the cessation of this protocol.

110

111 *2.6 Post-stimulation behavioral assays (resident intruder test, social interaction test, female*  
112 *exposure test)*

113 Behavioral experiments were conducted 24 hours after the final chronic optogenetic stimulation  
114 session. All behavioral assays were recorded using a web-camera (Logitech HD).

115

116 *Resident intruder test*

117 Experimental animals and their homecage enrichment were transferred from their homecage to  
118 a clean holding cage with their cagemates. The homecage with bedding was used as an  
119 experimental chamber with a clear, ventilated acrylic cage top. One experimental mouse from  
120 the cage was placed back into the homecage and allowed to acclimate for 1 minute, after which  
121 a novel conspecific juvenile male (PD 24-28) was introduced into the experimental male's  
122 homecage for a 5 minute test session. Interaction was manually scored by the experimenter and  
123 was measured as experimental male-initiated behavior (defined as chasing, sniffing, or  
124 grooming the juvenile conspecific intruder).

125

126 *Social interaction test*

127 An open arena (24" x 24") with black walls was used for the social interaction test. Two inverted  
128 wire cups of diameter 4" and height 4.25" (Spectrum Diversified Galaxy Pencil Holder) were  
129 placed in the arena in opposite corners, each set 6" away from the corner of the arena. Red lab  
130 tape was placed on the floor of the arena around the outside of the wire cup to demarcate a  
131 diameter 4 cm larger than that of the cup. A juvenile male conspecific (PD 24-28) was placed  
132 into one wire cup (herein referred to as conspecific cup), while the other cup was left empty  
133 (herein referred to as empty cup). The test animal was placed into the middle of the arena and  
134 was allowed to freely explore the arena for 10 minutes. Experimenters scored the total amount  
135 of time that the experimental animal spent within each region outlined by tape, and computed

136 the time spent with the conspecific cup, as well as the difference score (percent time spent with  
137 empty cup subtracted from percent time spent with conspecific cup).

138

### 139 *Female exposure*

140 One female mouse (PD 30-40) was placed into a clean homecage with a clear acrylic, ventilated  
141 cage top, which was used as the interaction chamber. The experimental male mouse was then  
142 placed into the chamber and was allowed to interact freely for 5 minutes. The amount of time  
143 the male mouse interacted with the female - defined as sniffing, chasing, mounting, or other  
144 contact initiated by the male - was manually scored.

145

### 146 *2.7 Neurogenesis*

147 In a separate cohort of animals, stereotaxic surgery was performed to infuse pAAV<sub>9</sub>-*c-Fos*-tTA +  
148 pAAV<sub>9</sub>-TRE-ChR2-eYFP into the dDG and mice were then left undisturbed to recover for 10  
149 days. On day 11, animals were taken off dox for 48 hours and left undisturbed in their  
150 homecages. Animals were then split into 3 groups: footshock (negative), novel homecage  
151 (neutral), or female exposure (positive) (refer to: *Experience tag*). Cells active during these  
152 behavioral epochs were labelled. Mice were then subjected to the chronic optogenetic  
153 stimulation protocol (see *Chronic Stimulation Protocol*) and were then left undisturbed in their  
154 homecages for 7 days to allow for optimal doublecortin expression (Couillard-Despres et al.,  
155 2005). On the 8th day, animals were euthanized, and their brains were extracted for  
156 immunohistochemical staining (see *Immunohistochemistry*). Doublecortin-positive cells in the  
157 upper and lower blade of the DG granule cell layer were manually counted by an experimenter  
158 (see *Cell Counting*)

159

### 160 *2.8 Immunohistochemistry*

161 Mice were overdosed with isoflurane and perfused transcardially first with 40 mL ice cold 1X  
162 phosphate-buffered saline (PBS) followed by 40 mL ice cold 4% paraformaldehyde in PBS.  
163 Brains were extracted and stored at 4°C, first in 4% paraformaldehyde for 48 hours, and  
164 subsequently in PBS. A vibratome was used to obtain 50-µm coronal slices, which were stored  
165 in 24-well plates in PBS at 4°C. These slices were incubated with 1X PBS with 2% Triton (PBS-  
166 T) + 5% normal goat serum (NGS) for one hour at room temperature for blocking. Primary  
167 antibodies were diluted in PBS-T + 5% NGS as follows: guinea pig anti-c-Fos (1:1000, Synaptic  
168 Systems, #226 004), chicken anti-GFP (1:1000, Invitrogen, #A10262), and rabbit anti-  
169 doublecortin (1:500, Synaptic Systems, # 326 003). Slices were incubated in the primary

170 solution at 4°C for 24 h on an orbital shaker. This was followed by three 10 minute washes in  
171 PBS-T, shaking at room temperature. Slices were then incubated with a secondary antibody  
172 solution for 2 h at room temperature, shaking. Secondary antibodies were diluted in PBS-T +  
173 5% NGS as follows: Alexa 555 goat anti-guinea pig (1:200, Invitrogen, #A21435), Alexa 488  
174 goat anti-chicken (1:200, Invitrogen, #A11039), and Alexa 555 goat anti-rabbit (1:200,  
175 Invitrogen, #A21429). Again, this was followed by three 10-minute washes in PBS-T at room  
176 temperature, shaking. Slices were then mounted onto microscope slides with VECTASHIELD®  
177 Hardset™ Antifade Mounting Medium with DAPI (Vector Labs, #H-1500).

178

### 179 *2.9 c-Fos quantification*

180 The total number of neurons immunoreactive for c-Fos were counted in several brain regions -  
181 prefrontal cortex (PFC), nucleus accumbens core (NAcc Core), nucleus accumbens shell (NAcc  
182 Shell), lateral septum (LS), dorsomedial hypothalamus (dmHyp), lateral hypothalamus (LatHyp),  
183 dorsal CA1 (dCA1), dorsal CA3 (dCA3), basolateral amygdala (BLA), and lateral habenula  
184 (LHb) - to measure neuronal activity in these areas during defined behavioral assays (female  
185 exposure test, resident intruder test, and social interaction test). Animals were euthanized 90  
186 minutes following these tasks, to maximize the robustness of c-Fos expression. Following brain  
187 extraction, 3 coronal slices were selected from each of the following regions: approximately  
188 +1.15 AP, -2.2 AP, and -2.78 AP. This allowed for visualization of the six brain regions of  
189 interest. Following c-Fos staining, the brain regions of interest were imaged using a confocal  
190 microscope (Zeiss LSM-800). Images were then processed using FIJI software. The Despeckle  
191 tool was used to reduce background noise, and the Subtract Background tool was used to  
192 create greater contrast between cells and background. Each brain region z-stack was set to  
193 include a 320 µm x 320 µm region of interest (ROI), then processed using the 3D Iterative  
194 Thresholding of the 3D ImageJ Suite (Ollion, Cochenec, Loll, Escudé, & Boudier, 2013). The  
195 settings for thresholding were set constant for each brain region of each cohort, with a minimum  
196 threshold and preliminary size filter, to maintain consistency in image processing and cell  
197 counting parameters between animals. The thresholded images were then z-projected to create  
198 flat images of the thresholded objects discovered by the plug-in. In order to isolate cell objects  
199 from artifacts such as blood vessels or noise, the images were then run through a pipeline  
200 created in Cell Profiler 3.1.8 software that identified objects of a particular (more stringent) size  
201 and shape. The number of c-Fos-positive cells was recorded for each ROI and averaged within  
202 each animal.

203



## 204 2.10 Doublecortin quantification

205 Following chronic reactivation of dDG cells encoding a negative, neutral, or positive experience,  
206 animals were left undisturbed in the homecage for 7 days to allow for optimal expression of  
207 doublecortin, a marker of neurogenesis. The number of neurons in dDG and vDG  
208 immunoreactive for doublecortin (DCX) was examined to determine levels of neurogenesis. In  
209 FIJI software, DCX-positive cells were selected in each layer in the z-stack with the Oval tool  
210 and added to the ROI Manager. Only DCX-positive cells in a 600  $\mu\text{m}$  x 100  $\mu\text{m}$  ROI were  
211 counted. Cells in the dorsal and ventral blades of the dentate gyrus were counted separately.

212

## 213 2.11 dDG target verification and ensemble size quantification

214 In all cohorts, immunoreactivity for eYFP (by proxy of anti-GFP staining) was examined to  
215 ensure bilateral expression of the virus in targeted regions. Animals that did not show eYFP  
216 immunoreactivity bilaterally in the target region were excluded from analysis. Activity-dependent  
217 ensemble size was determined using a subset of animals in each group; the number of eYFP-  
218 positive cells in a 600  $\mu\text{m}$  x 100  $\mu\text{m}$  ROI in the dorsal blade of dDG was manually quantified  
219 using FIJI software as described above.

220

## 221 2.12 Statistical Methods

222 Calculated statistics are presented as means  $\pm$  SEM. To analyze differences, we used two-  
223 way repeated measures (RM) ANOVAs (between subject factor: Group; within-subject factor:  
224 Time). When time was not a factor, we used one-way ANOVAs. When appropriate, these tests  
225 were followed up with post-hoc analyses (Tukey HSD; Sidak, and *a priori* t-tests). All data were  
226 tested for normality using Shapiro-Wilk test and homogeneity of variance was assessed with  
227 Levene's test. In the case of the necessity of non-parametric statistics, Kruskal Wallis tests  
228 were used. Data were analyzed using GraphPad Prism 8.0 and SPSS Statistics v26 software.  
229 Alpha was set to 0.05. All tests were two-tailed.

230

## 231 2.13 Data Availability

232 All relevant data supporting the findings of this study are available from the corresponding  
233 author upon reasonable request.

234

## 235 3. Results

236 Hippocampal cells were tagged during either a positive, negative, or neutral behavioral  
237 epoch, a design that was implemented to allow for stimulation of similarly sized cellular

238 ensembles encoding experiences of different valences. Mice showed no differences across  
239 groups in terms of the number of eYFP cells labelled in the dDG (One-Way ANOVA,  $F_{2,13} =$   
240 1.392,  $p = 0.2834$ ) (Figure 1C-D). Animals then underwent a previously established (Chen et al.,  
241 2019; Ramirez et al., 2015) 10 minute optogenetic stimulation protocol twice daily for 5 days,  
242 followed by a behavioral test assessing social behaviors (Figure 1E).

243 To test the effects of chronic stimulation on social behaviors, male mice underwent a  
244 female exposure test after chronic stimulation (Felix-Ortiz, Burgos-Robles, Bhagat, Leppla, &  
245 Tye, 2016) (Figure 1F). A Two-Way RM ANOVA revealed that mice did not differ in their  
246 baseline levels of interaction with a female as there was no main effect of group ( $F_{2,21} = 0.0303$ ,  
247  $p = 0.9702$ ). However, there was a main effect of time ( $F_{1,21} = 22.30$ ,  $p = 0.0001$ ) when  
248 compared to pre-stimulation baseline such that male mice interacted more in the post-  
249 stimulation test (Figure 1F). While there was a general increase over time in all groups, post hoc  
250 analyses revealed that this effect was driven by differences in the positive ( $p = 0.0128$ ) and  
251 negative ( $p = 0.0073$ ) groups suggesting that chronic stimulation of a salient or valent  
252 experience can increase the propensity to interact socially and this may be more pronounced  
253 after stimulation of an aversive cellular ensemble in particular. Similar to baseline, there were no  
254 group differences during the post-stimulation female exposure test.

255 We next assessed if chronically reactivating hippocampus-mediated memories affected  
256 social behavior involving only males using two additional tests: social interaction and resident  
257 intruder (Figure 1G-H). Surprisingly, chronic optogenetic stimulation of dDG cells involved in the  
258 encoding of a positive, negative, or neutral behavioral epoch did not result in group differences  
259 in time spent interacting with a novel, juvenile conspecific male in the social interaction test  
260 (One-Way ANOVA for time interacting  $F_{2,25} = 0.09415$ ,  $p = 0.9105$  and difference score  $F_{2,25} =$   
261 0.1382,  $p = 0.8716$ ) or the resident intruder test (One-Way ANOVA  $F_{2,23} = 0.3150$ ,  $p = 0.7329$ ).  
262 Notably, as mice were not administered a baseline test of these measures prior to chronic  
263 stimulation due to the nature of our “tagged” experience, these comparisons could only be made  
264 at the post stimulation time point, therefore within-group changes in social interaction or resident  
265 intruder behaviors could not be assessed.

266 Given the observed within animal differences in time spent interacting with a female  
267 mouse pre- vs. post-stimulation, we sought to determine whether stimulation of ensembles  
268 encoding negative, neutral or positive memories had lasting effects on regional brain activity.  
269 Previous research has shown that brain-wide expression of c-Fos is distinct during male or  
270 female social behaviors (Kim et al., 2015). Therefore, we quantified the mean number of c-Fos+  
271 cells in various brain regions implicated in processing social interaction and valence (Figure 2B).



272 We found no group differences in the mean number of c-Fos+ cells per area in all brain regions  
273 observed (see figure legend for statistics in each brain region). Surprisingly, neurogenesis in the  
274 DG was not differentially affected by chronic reactivation of dDG neuronal ensembles. Previous  
275 studies have found that chronic optogenetic stimulation of cells encoding female exposure  
276 rescues stress-induced deficits in neurogenesis in the DG and social behaviors are known to  
277 modulate levels of neurogenesis (Gheusi, Ortega-Perez, Murray, & Lledo, 2009; Opendak,  
278 Briones, & Gould, 2016; Ramirez et al., 2015). However, in the current study, we quantified cells  
279 expressing doublecortin, a neuronal marker for immature neurons, and found no group  
280 differences in expression (Figure 3B-E). Chronically stimulating positive, neutral, or negative  
281 dDG ensembles had no effect on neurogenesis in the dorsal (One Way ANOVA,  $F_{2,10} = 0.4617$ ,  
282  $p = 0.6430$ ) or ventral ( $F_{2,10} = 0.1272$ ,  $p = 0.8819$ ) DG, suggesting that the observed effects of  
283 chronic optogenetic stimulation of differentially-valent experiences on female interaction were  
284 not likely due to underlying changes in neurogenesis. However, the lack of long-term effects on  
285 c-Fos and neurogenesis aligns with lack of group differences in post-stimulation behaviors.

286

#### 287 **4. Discussion**

288 Our findings demonstrate that chronic stimulation of dDG neurons involved in the  
289 encoding of a salient behavioral experience can drive an increase in male-female interactions  
290 post-stimulation, an effect partially modulated by the valence of memory stimulated, consistent  
291 with the hippocampus' role in processing both mnemonic and valence-related information  
292 (Fanselow & Dong, 2010). Interestingly, stimulation of cells encoding an aversive (footshock) or  
293 socially appetitive (female encounter) experience both drove enhancement of subsequent  
294 female interaction. Thus, reactivating cells that encoded experiences of opposite valence  
295 modulated behavior similarly, when comparing footshock and female exposure groups to mice  
296 that experienced stimulation of cells encoding a novel homecage exposure. While our results  
297 suggest a mild increase in subsequent female interaction within the neutral group, this increase  
298 failed to reach statistical significance, potentially indicating that while cells processing a novel  
299 homecage exploration are sufficient to act as a functional conditioned stimulus when acutely  
300 activated (Ramirez et al., 2013), they may not be sufficient to drive differences in social  
301 behaviors when chronically stimulated. Together, this suggests stimulation of cells that process  
302 more salient experiences, such as footshock or female exposure, is more effective for driving  
303 changes in subsequent female interaction.

304 We propose that these findings add a valence- and experience-specific social element to  
305 previous studies that measured hippocampus-mediated memory recall in which stimulation of

306 differentially valent memories drove bidirectional effects on behavioral responses (Chen et al.,  
307 2019; Ramirez et al., 2015). While these studies found that chronic stimulation induced  
308 behavioral changes specifically at post-stimulation timepoints, we speculate that our lack of  
309 post-stimulation behavioral and regional brain activity *across* groups are a result of varying  
310 stimulation protocols (chronic vs. acute) and timing of stimulation (i.e. during a behavioral  
311 testing session) within an experimental protocol. For instance, chronic stimulation may affect  
312 behaviors between groups only following chronic stress, and acute optogenetic stimulation may  
313 alter behavior during a stimulation session but may not be sufficient to induce lasting structural  
314 or functional changes supporting enduring behavioral effects (Ramirez et al., 2015; Redondo et  
315 al., 2014). Overall, these findings suggest chronic stimulation of distinct hippocampal memory  
316 ensembles may drive variable behavioral responses depending on the specific cellular  
317 ensemble reactivated and type of behavior measured.

318         Moreover, as reactivation of dDG cells encoding both a fearful experience or a novel  
319 female encounter drove a subsequent increase in interaction with a female, we speculate that  
320 continued reactivation of a positive memory engram cells may reinforce the downstream  
321 responses promoting female interaction or mate-seeking behavior, in a manner perhaps similar  
322 to how chronic stimulation of a contextual memory can bi-directionally modulate the original  
323 memory itself (Chen et al. 2019). However, it is less clear why continued reactivation of cells  
324 encoding a fear memory would also increase subsequent female interaction. We posit that  
325 chronic stimulation extinguished fear responses and thereby encouraged female interaction, as  
326 chronic reactivation of dDG fear memory ensembles has been shown to reduce contextual fear  
327 responses (Chen et al. 2019). Alternatively, it is possible that repeated reactivation of dDG cells  
328 encoding fear caused mice to seek female interaction further, as female interaction has also  
329 been shown to attenuate fear (Bai, Cao, Liu, Xu, & Luo, 2009). It is important to note that with  
330 our experimental design, it is possible that the within-group enhancement of female interaction  
331 time was driven by a combination of chronic optogenetic stimulation of dDG populations  
332 encoding different valenced experiences and by different orders of experienced behaviors,  
333 though we believe this is unlikely as we observed no group differences in the pre-stimulation  
334 female interaction test. Finally, a second female encounter may contribute to this enhancement  
335 of female interaction across time, as well. However, due to the stronger effect observed in the  
336 negative (shock) and positive (female) stimulation groups relative to chronic stimulation of a  
337 dDG population encoding a neutral (homeage) experience, we believe that the stimulation of  
338 the negatively and positively valenced dDG neuronal ensembles further enhanced female  
339 interaction beyond the effects of re-exposure to a female per se.

340            Interestingly, we did not find group differences in social behavior when comparing  
341 groups that had received chronic stimulation of negative, neutral, or positive dDG populations  
342 during the post-stimulation behavioral test (Fig 1F-H). This suggests that while chronic  
343 stimulation of dDG ensembles encoding fear or female exposure may facilitate subsequent  
344 female interaction in a within-subject manner across time, chronic stimulation of these different  
345 ensembles does not result in between-group differences at a single time point, possibly due to  
346 the differences in optogenetic protocols discussed above. These data are supported by our  
347 observations that chronic stimulation of dDG memory ensembles did not yield group differences  
348 in c-Fos expression throughout several brain regions, or result in changes in neurogenesis in  
349 the ventral or dorsal DG. While our design did not implement a pre-stimulation test for social  
350 interaction or resident intruder behaviors, future studies can assess if performing these tests  
351 would result in a similar within-group increase in social interaction with our chronic stimulation  
352 protocol.

353            Our results shed further light on the relationship between optogenetic stimulation and  
354 neurogenesis in the DG. In our previous reports, chronic activation of a positive memory  
355 reversed the effects of stress on neurogenesis, highlighting putative differential effects of  
356 stimulating hippocampal cells in a stressed or unstressed rodent (Ramirez et al., 2015). Our  
357 results indicate that chronic stimulation of dDG ensembles alone is not sufficient to do so,  
358 suggesting that changes in neurogenesis induced by chronic optogenetic stimulation may occur  
359 only when administered after stress. It is possible that stress reduces cognitive flexibility, which  
360 chronic optogenetic stimulation is sufficient to circumvent and that such perturbations in a  
361 healthy rodent have already reached a “ceiling effect” in their capacity to modulate the  
362 production of adult-born cells (Anacker & Hen, 2017). Our recent work suggested a bi-  
363 directional role for the dorsal and ventral hippocampus in respectively suppressing or enhancing  
364 context-specific memories, and we speculate that the capacity for chronic stimulation of  
365 hippocampal cells to alter neurogenesis levels too may depend on the site stimulated (Anacker  
366 et al., 2018; Chen et al., 2019). Importantly, our findings indicate that chronic stimulation of  
367 sparse DG populations does not have adverse, off-target effects on neurogenesis, which is a  
368 promising assurance for future studies employing similar chronic optogenetic stimulation in the  
369 same brain region.

370            Together, our results point to the need for future research aimed at understanding the  
371 varying effects of chronic stimulation on different brain areas or specific sets of cells stimulated.  
372 For instance, stimulation of differently valenced dDG ensembles failed to differentially affect  
373 social behavior across groups during post-stimulation social interactions, and this may be due to

374 dorso-ventral differences in the encoding of contextual, emotional or social information, which  
375 underscores the ventral DG's prominence in processing similar types of information (Ciocchi,  
376 Passecker, Malagon-Vina, Mikus, & Klausberger, 2015; Kheirbek et al., 2013; Okuyama,  
377 Kitamura, Roy, Itohara, & Tonegawa, 2016), its influence on neurogenesis (Anacker et al.,  
378 2018), and its putative promise as a future target for chronic stimulation.

379 Finally, a myriad of recent studies have leveraged the effects of repeatedly activating  
380 various brain regions and circuits to note their enduring effects on behavior. For instance,  
381 optogenetic-induced long-term depotentiation was sufficient to lastingly impair a memory while  
382 subsequent induction of long-term potentiation restored the expression of the memory (Nabavi  
383 et al., 2014). Additionally, high-frequency spike trains that lasted for 10 minutes were sufficient  
384 to alter excitation/inhibition balance and spine levels in the hippocampus and also facilitated the  
385 extinction of a contextual memory (Mendez, Stefanelli, Flores, Muller, & Lüscher, 2018), which  
386 points to the power of prolonged optogenetic strategies in modifying the structural and functional  
387 properties of the hippocampus. Various groups have also utilized optogenetic-inspired deep-  
388 brain stimulation strategies to provide a translational approach to enduringly reprogram a brain  
389 out of a maladaptive state (Creed et al., 2019), and we propose that artificially manipulating  
390 engrams provides a conceptual means by which to resculpt neural activity and behavior.

391 Overall, our data suggest that chronic stimulation of hippocampus-mediated memory  
392 engrams can differentially affect social behaviors over time without inducing widespread  
393 changes in c-Fos or neurogenesis, reinforcing the importance of considering multiple factors  
394 such as off-target effects (Otchy et al., 2015), the specific behavioral assays used, and which  
395 measures of neural changes will be analyzed when implementing chronic stimulation protocols.

396

### 397 **Acknowledgements**

398 We would like to thank Joshua Sanes and his lab (Center for Brain Science, Harvard University)  
399 for providing laboratory space within which the initial experiments were conducted; Harvard  
400 University's Center for Brain Science Neuroengineering core for providing technical support. We  
401 thank Abby Finkelstein for helpful comments on the manuscript. Finally, we would like to thank  
402 Susumu Tonegawa and his lab (Massachusetts Institute of Technology) for providing the  
403 activity-dependent virus cocktail. This work was supported by an NIH Early Independence  
404 Award (DP5 OD023106-01), a Transformative R01, Young Investigator Grant from the Brain  
405 and Behavior Research Foundation, a Milton Grant from the Society of Fellows at Harvard  
406 University, a Ludwig Family Foundation Grant, and the McKnight Foundation Memory and  
407 Cognitive Disorders Award.

408

#### 409 **Author Contributions**

410 E.D., H.L., A.M., C.C., J.L., S.L.G., and S.R. designed and performed the experiments. E.D.,  
411 A.M., H.L., and S.R. wrote the paper. All authors edited and commented on the manuscript.

412

#### 413 **Competing Financial Interests**

414 The authors declare no competing interests.

415

#### 416 **References**

417 Anacker, C., & Hen, R. (2017). Adult hippocampal neurogenesis and cognitive flexibility - linking  
418 memory and mood. *Nature Reviews. Neuroscience*, 18(6), 335—346.

419 <https://doi.org/10.1038/nrn.2017.45>

420 Anacker, C., Luna, V. M., Stevens, G. S., Millette, A., Shores, R., Jimenez, J. C., ... Hen, R.  
421 (2018). Hippocampal neurogenesis confers stress resilience by inhibiting the ventral  
422 dentate gyrus. *Nature*, 559(7712), 98–102. <https://doi.org/10.1038/s41586-018-0262-4>

423 Bai, H. Y., Cao, J., Liu, N., Xu, L., & Luo, J. H. (2009). Sexual behavior modulates contextual  
424 fear memory through dopamine D1/D5 receptors. *Hippocampus*, 19(3), 289–298.

425 <https://doi.org/10.1002/hipo.20505>

426 Chen, B. K., Murawski, N. J., Cincotta, C., McKissick, O., Finkelstein, A., Hamidi, A. B., ...  
427 Ramirez, S. (2019). Artificially Enhancing and Suppressing Hippocampus-Mediated  
428 Memories. *Current Biology*, 29(11), 1885-1894.e4.

429 <https://doi.org/10.1016/j.cub.2019.04.065>

430 Ciochi, S., Passecker, J., Malagon-Vina, H., Mikus, N., & Klausberger, T. (2015). Selective  
431 information routing by ventral hippocampal CA1 projection neurons. *Science*, 348(6234),  
432 560 LP – 563. <https://doi.org/10.1126/science.aaa3245>

433 Couillard-Despres, S., Winner, B., Schauback, S., Aigner, R., Vroemen, M., Weidner, N., ...  
434 Aigner, L. (2005). Doublecortin expression levels in adult brain reflect neurogenesis.  
435 *European Journal of Neuroscience*, 21(1), 1–14. [https://doi.org/10.1111/j.1460-](https://doi.org/10.1111/j.1460-9568.2004.03813.x)  
436 [9568.2004.03813.x](https://doi.org/10.1111/j.1460-9568.2004.03813.x)

437 Creed, M., Pascoli, V. J., & Lüscher, C. (2019). Refining deep brain stimulation to emulate  
438 optogenetic treatment of synaptic pathology. *Science*, 347(6222), 659–665.

439 Fanselow, M. S., & Dong, H. W. (2010). Are the Dorsal and Ventral Hippocampus Functionally  
440 Distinct Structures? *Neuron*, 65(1), 7–19. <https://doi.org/10.1016/j.neuron.2009.11.031>

- 441 Felix-Ortiz, A. C., Burgos-Robles, A., Bhagat, N. D., Leppla, C. A., & Tye, K. M. (2016).  
442 Bidirectional modulation of anxiety-related and social behaviors by amygdala projections to  
443 the medial prefrontal cortex. *Neuroscience*.  
444 <https://doi.org/10.1016/j.neuroscience.2015.07.041>
- 445 Garner, A. R., Rowland, D. C., Hwang, S. Y., Baumgaertel, K., Roth, B. L., Kentros, C., &  
446 Mayford, M. (2012). Generation of a Synthetic Memory Trace. *Science*, 335(6075), 1513  
447 LP – 1516. <https://doi.org/10.1126/science.1214985>
- 448 Gheusi, G., Ortega-Perez, I., Murray, K., & Lledo, P. M. (2009). A niche for adult neurogenesis  
449 in social behavior. *Behavioural Brain Research*, 200(2), 315–322.  
450 <https://doi.org/10.1016/j.bbr.2009.02.006>
- 451 Kheirbek, M. A., Drew, L. J., Burghardt, N. S., Costantini, D. O., Tannenholz, L., Ahmari, S. E.,  
452 ... Henl, R. (2013). Differential control of learning and anxiety along the dorsoventral axis of  
453 the dentate gyrus. *Neuron*, 77(5), 955–968. <https://doi.org/10.1016/j.neuron.2012.12.038>
- 454 Kim, Y., Venkataraju, K. U., Pradhan, K., Mende, C., Taranda, J., Turaga, S. C., ... Osten, P.  
455 (2015). Mapping social behavior-induced brain activation at cellular resolution in the  
456 mouse. *Cell Reports*, 10(2), 292–305. <https://doi.org/10.1016/j.celrep.2014.12.014>
- 457 Liu, X., Ramirez, S., Pang, P. T., Puryear, C. B., Govindarajan, A., Deisseroth, K., & Tonegawa,  
458 S. (2012). Optogenetic stimulation of a hippocampal engram activates fear memory recall.  
459 *Nature*, 484(7394), 381–385. <https://doi.org/10.1038/nature11028>
- 460 Mendez, P., Stefanelli, T., Flores, C. E., Muller, D., & Lüscher, C. (2018). Homeostatic Plasticity  
461 in the Hippocampus Facilitates Memory Extinction. *Cell Reports*, 22(6), 1451–1461.  
462 <https://doi.org/10.1016/j.celrep.2018.01.025>
- 463 Nabavi, S., Fox, R., Proulx, C. D., Lin, J. Y., Tsien, R. Y., & Malinow, R. (2014). Engineering a  
464 memory with LTD and LTP. *Nature*, 511(7509), 348–352.  
465 <https://doi.org/10.1038/nature13294>
- 466 Okuyama, T., Kitamura, T., Roy, D. S., Itoharu, S., & Tonegawa, S. (2016). Ventral CA1  
467 neurons store social memory. *Science*, 353(6307), 1137–1144.  
468 <https://doi.org/10.1038/mp.2015.189>. Targeted
- 469 Ollion, J., Cochenec, J., Loll, F., Escudé, C., & Boudier, T. (2013). TANGO: A generic tool for  
470 high-throughput 3D image analysis for studying nuclear organization. *Bioinformatics*,  
471 29(14), 1840–1841. <https://doi.org/10.1093/bioinformatics/btt276>
- 472 Opendak, M., Briones, B. A., & Gould, E. (2016). Social behavior, hormones and adult  
473 neurogenesis. *Frontiers in Neuroendocrinology*, 41, 71–86.  
474 <https://doi.org/10.1016/j.yfrne.2016.02.002>



- 475 Otchy, T. M., Wolff, S. B. E., Rhee, J. Y., Pehlevan, C., Kawai, R., Kempf, A., ... Ölveczky, B. P.  
476 (2015). Acute off-target effects of neural circuit manipulations. *Nature*, 528(7582), 358–  
477 363. <https://doi.org/10.1038/nature16442>
- 478 Pittenger, C., & Duman, R. S. (2008). Stress, depression, and neuroplasticity: A convergence of  
479 mechanisms. *Neuropsychopharmacology*, 33(1), 88–109.  
480 <https://doi.org/10.1038/sj.npp.1301574>
- 481 Ramirez, S., Liu, X., Lin, P.-A., Suh, J., Pignatelli, M., Redondo, R. L., ... Tonegawa, S. (2013).  
482 Creating a false memory in the hippocampus. *Science*, 341(July), 387–392.
- 483 Ramirez, S., Liu, X., MacDonald, C. J., Moffa, A., Zhou, J., Redondo, R. L., & Tonegawa, S.  
484 (2015). Activating positive memory engrams suppresses depression-like behaviour.  
485 *Nature*, 522(7556), 335–339. <https://doi.org/10.1038/nature14514>
- 486 Redondo, R. L., Kim, J., Arons, A. L., Ramirez, S., Liu, X., & Tonegawa, S. (2014). Bidirectional  
487 switch of the valence associated with a hippocampal contextual memory engram. *Nature*,  
488 513(7518), 426–430. <https://doi.org/10.1038/nature13725>
- 489 Russo, S. J., & Nestler, E. J. (2013). The brain reward circuitry in mood disorders. *Nature*  
490 *Reviews Neuroscience*, 14(9), 609–625. <https://doi.org/10.1038/nrn3381>
- 491 Sun, X., Bernstein, M. J., Meng, M., Zhang, X., Anikeeva, P. O., Lin, Y., ... Zhang, X. (2020).  
492 Functionally Distinct Neuronal Ensembles within the Memory Engram Article Functionally  
493 Distinct Neuronal Ensembles within the Memory Engram. *Cell*, 1–14.  
494 <https://doi.org/10.1016/j.cell.2020.02.055>
- 495 Tye, K. M. (2014). Neural circuit reprogramming: A new paradigm for treating neuropsychiatric  
496 disease? *Neuron*, 83(6), 1259–1261. <https://doi.org/10.1016/j.neuron.2014.08.022>

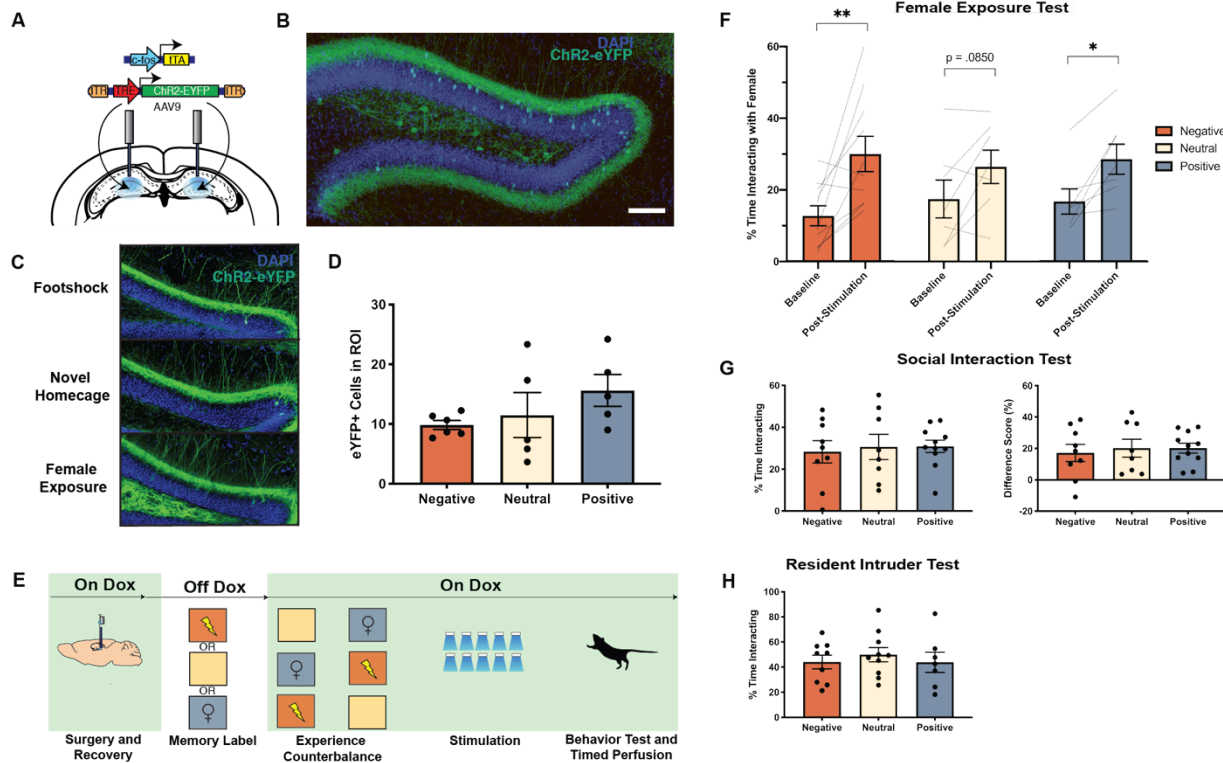

497

498

499 **Figure 1. Chronic optogenetic stimulation of dDG Ensembles differentially modulates**

500 **social behaviors.** (a) Viral constructs for doxycycline (dox)-gated activity-dependent expression

501 of ChR2 in the dDG. The immediate early gene *c-Fos* drives tetracycline transactivator (tTA),

502 which binds to its response element (TRE) to in turn drive expression of ChR2 in a dox-regulated

503 manner. (b) Representative image depicting expression of ChR2-eYFP (green) in the dDG. Scale

504 bar represents 100  $\mu\text{m}$ . (c) Representative images of ChR2-EYFP in DG for each group. (d)

505 Ensemble sizes are not significantly different for different behavioral epochs (One-Way ANOVA,

506  $F_{2,13} = 1.392$ ,  $p = 0.2834$  (Negative  $n = 6$ , Neutral  $n = 5$ , Positive,  $n = 5$ ) (d) Behavioral schedule and

507 groups used. Green regions depict periods in which dox was present in the diet, and white

508 regions depict regions where dox was removed to tag active cells ("memory label"). The orange

509 box with a shock symbol represents a four-shock protocol, the tan-colored box represents a clean

510 homecage exposure, and the gray box with a female symbol represents exposure to a female

511 conspecific. (f) Chronic stimulation of negative, neutral or positive ensembles increases female

512 interaction time (2 Way RM ANOVA, Main Effect of Time:  $F_{1,21} = 22.30$ ,  $p = .0001$ , Post-Hoc

513 paired t-tests Pre vs Post-stimulation: Negative  $p = .0073$ , Neutral  $p = .0850$ , Positive  $p = .0128$

514 (Negative  $n = 10$ , Neutral  $n = 7$ , Positive  $n = 7$ ) (g) Chronically stimulating dDG ensembles encoding

515 a negative, neutral or positive experience does not modulate post-stimulation behavior in the

516 social interaction test or (h) resident intruder test. Two separate cohorts of mice underwent the

517 protocol in a) with either the social interaction test or resident intruder test on the final day.  
518 Difference score represents the difference in time spent interacting with the conspecific cup and  
519 the empty cup in the social interaction test. Social interaction test, One-Way ANOVA Time  
520 interacting:  $F_{2,25} = 0.09415$ ,  $p=0.9105$ ; Difference Score:  $F_{2,25} = 0.1382$ ,  $p = 0.8716$  (Negative  
521  $n=9$ , Neutral  $n=8$ , Positive  $n=11$ ), Resident intruder test: One Way ANOVA  $F(2,23)=0.3150$ ,  
522  $p=0.7329$  (Negative  $n=9$ , Neutral  $n=10$ , Positive  $n=7$ ). Data are presented as mean  $\pm$  s.e.m.

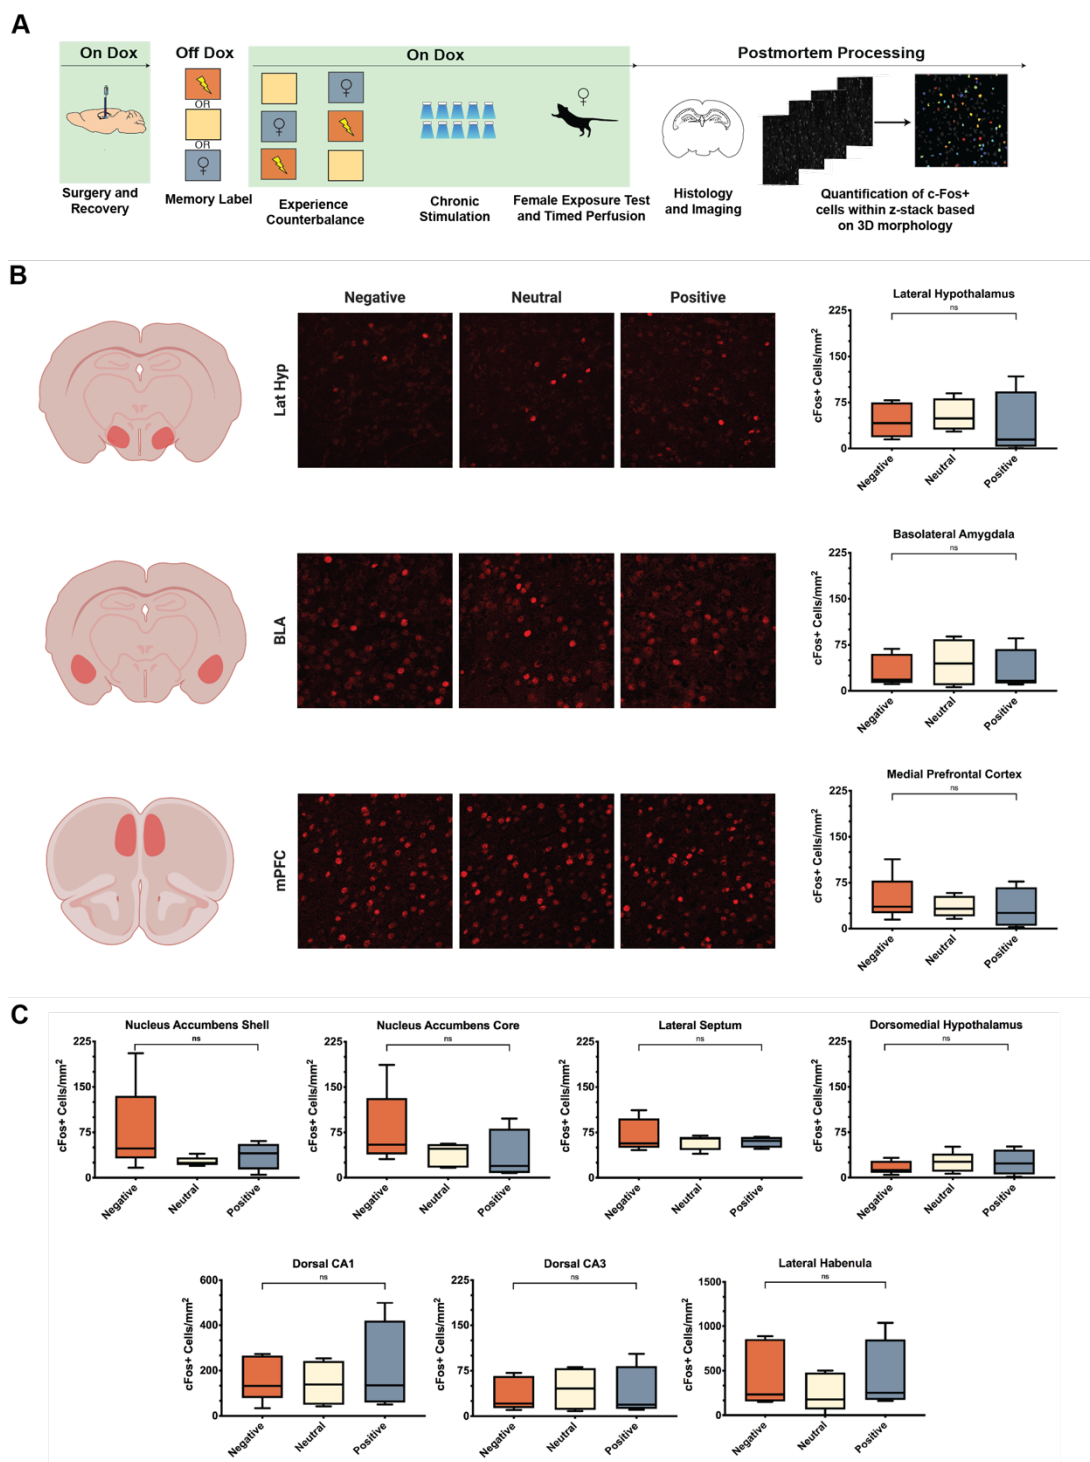

523

524

525 **Figure 2.** Chronically stimulating dDG ensembles encoding a foot shock, novel homecage, or  
 526 female exposure, experience does not differentially affect c-Fos across multiple brain regions. (a)  
 527 Behavioral schedule and groups used to examine brainwide c-Fos activation during female  
 528 exposure after chronic stimulation of different dDG ensembles. Green regions depict periods in

529 which dox was present in the diet, and white regions depict regions where dox was removed to  
 530 tag active cells (“memory label”). The orange box with a shock symbol represents a four-shock  
 531 protocol (Negative, n=5), the tan-colored box represents a clean homecage exposure (Neutral,  
 532 n=5) and the gray box with a female symbol represents exposure to a female conspecific  
 533 (Positive, n=4). **(b)** Representative images depicting expression in the lateral hypothalamus (Lat  
 534 Hyp), basolateral amygdala (BLA) and medial prefrontal cortex (mPFC) and quantification of c-  
 535 Fos activation during female exposure after chronic stimulation of dDG negative, neutral and  
 536 positive ensembles. (One-Way ANOVAs, lat Hyp:  $F_{2,10} = 0.2025$ ,  $p=0.8200$ ; BLA:  $F_{2,10} = 0.2163$ ,  $p$   
 537  $= 0.8091$ ; mPFC:  $F_{2,11} = 0.3545$ ,  $p = 0.7093$ ) **(c)** Mean c-Fos+ per area during post-stimulation  
 538 female exposure for nucleus accumbens core and shell (NAc Core, One-Way ANOVA:  $F_{2,11} =$   
 539  $1.356$ ,  $p = 0.2976$ ; NAc Shell, One-Way ANOVA:  $F_{2,11} = 1.581$ ,  $p=0.2492$ , Lateral Septum (LS,  
 540 Kruskal-Wallis test,  $H = 0.28$ ,  $p = 0.8791$ ), Dorsomedial hypothalamus (dmHyp, One-Way  
 541 ANOVA:  $F_{2,11} = 0.4055$ ,  $p = 0.6762$ ), dorsal CA3 (dCA3, One-Way ANOVA:  $F_{2,10} = 0.07539$ ,  $p =$   
 542  $0.9279$ ), dorsal CA1 (dCA1, One-Way ANOVA:  $F_{2,10} = 0.2$ ,  $p=0.8220$ ) and lateral habenula (LHb  
 543 One-Way ANOVA  $F_{2,11} = 0.5030$ ,  $p = 0.6180$ ).

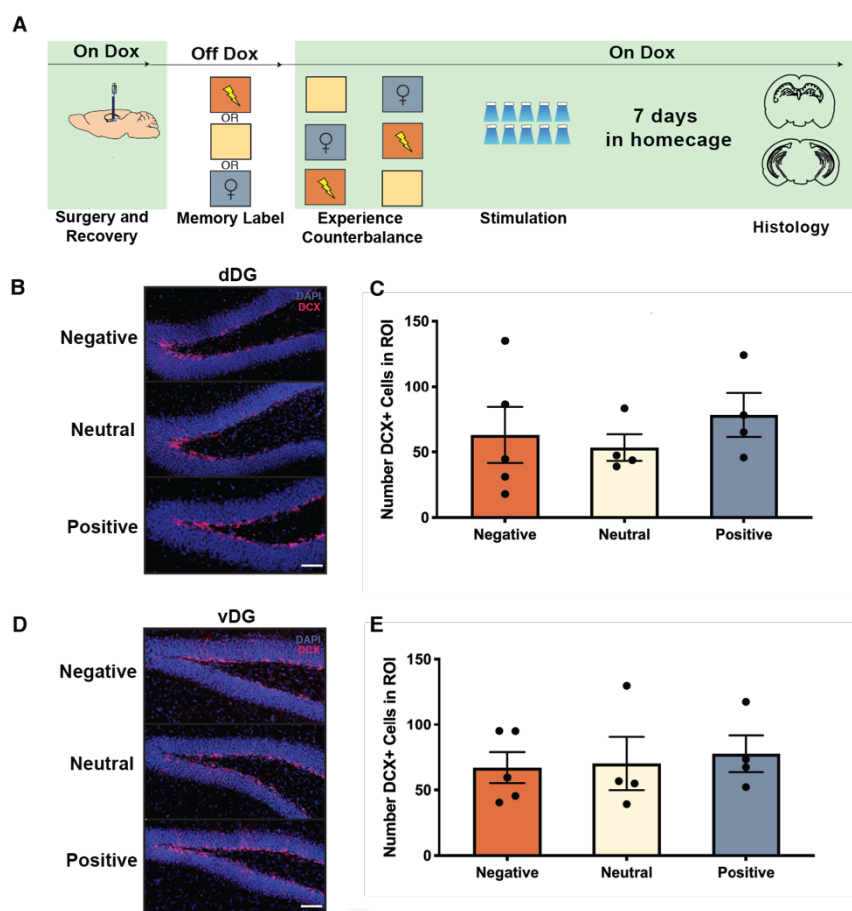

544  
 545

546 **Figure 3.** Chronically stimulating dDG ensembles encoding a foot shock, novel homecage, or  
547 female exposure, experience does not alter neurogenesis in dDG or vDG. **(a)** Behavioral  
548 schedule and groups used to examine neurogenesis induced by the chronic stimulation protocol.  
549 Green regions depict periods in which dox was present in the diet, and white regions depict  
550 regions where dox was removed to tag active cells (“memory label”). The orange box with a  
551 shock symbol represents a four-shock protocol (Negative, n=5), the peach-colored box  
552 represents a clean homecage exposure (Neutral, n=4) and the gray box with a female symbol  
553 represents exposure to a female conspecific (Positive, n=4). **(b)** Representative images of dDG  
554 **(c)** and quantification of doublecortin-positive cells (red) in the dDG for each group (One-Way  
555 ANOVA,  $F_{2,10} = 0.4617$ ,  $p = 0.6430$ ). **(d)** Representative images of vDG and quantification **(e)** of  
556 doublecortin-positive cells (red) in the vDG for each group (One-Way ANOVA,  $F_{2,10} = 0.1272$ ,  
557  $p=0.8819$ ). Data are presented as mean  $\pm$  s.e.m. Scale bar represents 100  $\mu$ m. Dorsal dentate  
558 gyrus (dDG), ventral dentate gyrus (vDG).
